# Supplementary material for: Combining Engineered U1 snRNA and Antisense Oligonucleotides to Improve the Treatment of a BBS1 Splice Site Mutation
Source: PubMed Central journal article supplement (PMC6796732; doi:10.1016/j.omtn.2019.08.014), 2019-08-16
Supplement: mmc1.pdf [file mmc1.pdf]

OMTN, Volume 18

## Supplemental Information

### **Combining Engineered U1 snRNA and Antisense Oligonucleotides to Improve the Treatment of a *BBS1* Splice Site Mutation**

Saskia Breuel, Mariann Vorm, Anja U. Bräuer, Marta Owczarek-Lipska, and John Neidhardt

1 Supplemental Material

2

3 Combining designed U1 snRNA and antisense oligonucleotides to improve the treatment of a *BBS1*  
4 splice site mutation.

5 Saskia Breuel<sup>1</sup>, Mariann Vorm<sup>1</sup>, Anja U. Bräuer<sup>2,3</sup>, Marta Owczarek-Lipska<sup>1</sup>, John Neidhardt<sup>1,3,4,\*</sup>

Figure S1:

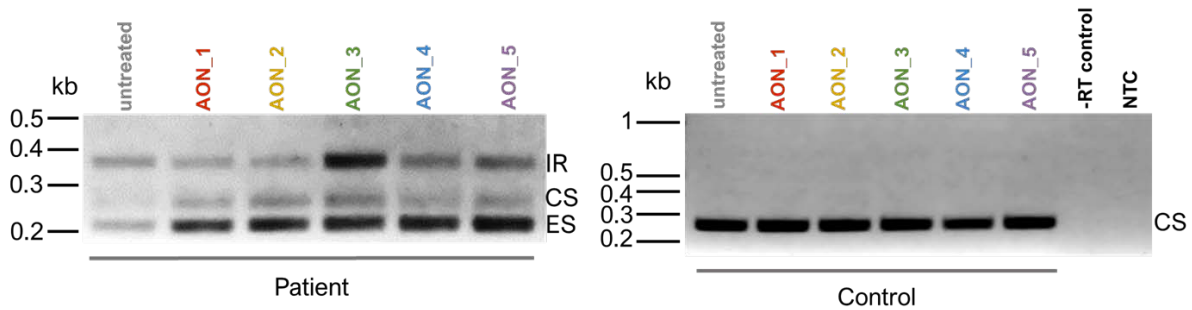

6

7 **Fig. S1: Verification of AON effects during the apoptosis assay.** Cells were lysed and RT-PCR reactions  
8 were performed after the apoptosis assays. AON concentrations were 36 nM. The efficacy of the tested  
9 AONs to reduce intron 5 retention in the patient samples resembles the results shown in Fig. 3. The AON  
10 treatment did not induce splice defects in control cells. NTC: none template control; -RT control: PCR  
11 control reaction using a template with RNA but no reverse transcriptase was added during cDNA-  
12 synthesis. CS: correctly spliced transcript, ES: exon skipping, IR: intron retention, kb: kilo bases.

13
